# Gestational Diabetes After Delivery

## Short-term management and long-term risks

JOHN L. KITZMILLER, MD<sup>1</sup>  
LEONA DANG-KILDUFF, RN, CDE<sup>2</sup>  
M. MARK TASLIMI, MD<sup>3</sup>

After the intensified treatment often required for treating gestational diabetes mellitus (GDM), clinicians may be tempted to relax after delivery of the baby. If it is assumed that no further management is needed, an excellent opportunity to improve the future health status of these high-risk women may be lost. There are special concerns for the early postpartum care of women with GDM. Encouragement and facilitation of exclusive breastfeeding is very important because of the profound short-term as well as long-term health benefits to the infant and the reduced risks for subsequent obesity and glucose intolerance demonstrated in many breastfeeding women. A method of contraception should be chosen that does not increase the risk of glucose intolerance in the mother. Some women with GDM will have persisting hyperglycemia in the days after delivery that will justify medical management for diabetes and perhaps for hypertension, microalbuminuria, and dyslipidemia. Treatment should be maintained according to the guidelines of the American Diabetes Association and other relevant organizations and adjusted for the needs of lactation. Treatment should be continued in adequate fashion to minimize risks to the early conceptus if there is a subsequent planned or unplanned pregnancy.

Most women with GDM will not have severe hyperglycemia after delivery. This group should be followed for

at least 6–12 weeks to determine their glucose status. Many studies over 3 decades on all continents of the globe demonstrate the high risk of subsequent diabetes in this female population. The degree of this risk is best assessed by glucose tolerance testing. Randomized controlled trials have proven that several interventions (diet and planned exercise 30–60 min daily at least 5 days per week and antidiabetic medications) can significantly delay or prevent the appearance of type 2 diabetes in the women with impaired glucose tolerance (IGT). The high-risk women can also be assessed for cardiovascular risk factors, with appropriate management and follow-up to reduce the risk of coronary heart disease, cardiomyopathy, and stroke. These women should be educated to seek specific preconception consultation before the next pregnancy to avoid the teratogenic effect of unrecognized diabetes.

### EARLY POSTPARTUM CARE —

Provision of puerperal obstetrical and neonatal care is the first concern after vaginal or cesarean delivery of women diagnosed with GDM (1). GDM mothers who had imperfect glycemic control, obesity, or hypertension may have an increased frequency of preterm delivery and postpartum complications (2–8). Hopefully, a minority of babies will need to be managed in the neonatal intensive care unit (9,10), but if they do, parental anxieties

need to be addressed and mother-infant bonding encouraged. Cesarean delivery and neonatal intensive care unit admissions are affected by parental and clinician input and institutional policies, as well as determined by glycemic control, obesity, and hypertension during pregnancy. If medication has been used to treat GDM, it is usually stopped at delivery. Encouragement and training for healthy nutrition, planned physical activity, and weight reduction as needed, continued cessation of smoking, facilitation of breastfeeding, and effective planning for the next or no more pregnancies are of high importance for all GDM mothers after delivery. Considerations concerning lactation (11,12) and contraception (13) in women with GDM are presented elsewhere in this supplement.

Immediate postpartum persistence of hyperglycemia at the level of type 2 diabetes is uncommon in women diagnosed with GDM, and type 1 diabetes is even more unusual. Both can be ruled out by a few fingerstick glucose tests in the first days after delivery (to rule out diabetes: fasting plasma glucose [FPG] <126 mg/dl, <7 mmol/l; casual plasma glucose <200 mg/dl, <11.1 mmol/l). If diabetes is suspected and is confirmed by laboratory fasting or casual glucose tests (14), medical nutrition therapy, self-monitoring of blood glucose, and planned physical activity are continued. The diabetic food plan should be designed for good glycemic control, effective lactation, and infant health. Consultation with a registered dietitian is desirable. If type 1 diabetes is suspected and confirmed (14), insulin therapy is reinstated.

If type 2 diabetes is suspected immediately postpartum, the addition of oral agents can be considered. Glyburide (glibenclamide) or glipazide do not appear in the breast milk of treated women (15), and any type of insulin can be used if needed during breastfeeding or bottle-feeding. Three small studies show that metformin is excreted into breast milk with a range of milk/plasma ratios of 0.35–0.71, but with no indication of harmful effects on the infants (16–18). Larger studies are needed to be able to determine that metformin therapy is indicated for diabetic

From the <sup>1</sup>Division of Maternal-Fetal Medicine, Santa Clara County Health System, San Jose, California; the <sup>2</sup>California Diabetes and Pregnancy Program, Stanford, California; and the <sup>3</sup>Department of Obstetrics and Gynecology, Stanford University Medical School, Stanford, California.

Address correspondence and reprint requests to John L. Kitzmiller, MD, Santa Clara Valley Health System, PEP Services, Suite 340, 750 S. Bascom Ave., San Jose, CA 95128. E-mail: kitz@batnet.com.

Received for publication 28 March 2006 and accepted in revised form 9 May 2006.

This article is based on a presentation at a symposium. The symposium and the publication of this article were made possible by an unrestricted educational grant from LifeScan, Inc., a Johnson & Johnson company.

**Abbreviations:** CVD, cardiovascular disease; FPG, fasting plasma glucose; GDM, gestational diabetes mellitus; GTT, glucose tolerance test; hsCRP, highly sensitive C-reactive protein; IFG, impaired fasting glucose; IGT, impaired glucose tolerance.

A table elsewhere in this issue shows conventional and Système International (SI) units and conversion factors for many substances.

DOI: 10.2337/dc07-s221

© 2007 by the American Diabetes Association.

**Table 1—Reasons to perform glucose tolerance testing after pregnancies complicated by GDM**

1. The substantial prevalence of glucose abnormalities detected by 3 months postpartum.
2. Abnormal test results identify women at high risk of developing diabetes over the next 5–10 years.
3. Ample clinical trial evidence in women with glucose intolerance that type 2 diabetes can be delayed or prevented by lifestyle interventions or modest and perhaps intermittent drug therapy.
4. Women with prior GDM and IGT or IFG have CVD risk factors. Interventions may also reduce subsequent CVD, which is the leading cause of death in both types of diabetes.
5. Identification, treatment, and planning pregnancy in women developing diabetes after GDM should reduce subsequent early fetal loss and major congenital malformations.

women during lactation. The use of acarbose is attractive during lactation because absorption of the oral drug is quite limited, but there are no studies of the pharmacological effect of delayed gastrointestinal absorption of carbohydrate on the quality of lactation. Use of a thiazolidinedione could also be an attractive choice, since the drugs are highly protein-bound “and the large volume of distribution of the maternal compartment should ensure that relatively little crosses into breast milk” (19), but there are no studies as yet of the use of pioglitazone or rosiglitazone in diabetic lactating women. Finally, the woman with diabetes should be educated about 1) the risk of early fetal loss and major congenital malformations if hyperglycemia is not controlled before the next pregnancy, 2) the possibility of prevention of diabetic complications with good control of glucose and blood pressure, and 3) the long-term risks of cardiovascular disease (CVD) with type 2 diabetes and means of its prevention (20,21). Women with GDM but without diabetes diagnosed immediately postpartum should be advised to have later glucose tolerance testing, to have a prepregnancy consultation before the next pregnancy, and to request early glucose screening in the next pregnancy.

In the absence of obvious diabetes soon after delivery, the timing of delayed postpartum glucose tolerance testing (6–12 weeks or later) may depend on the length of continuation of health insurance coverage. Obstetrical or medical care should continue until delayed postpartum glucose status is determined and the patient is educated about indicated preventive therapy or diabetes/CVD risk reduction. Patient referral may be necessary to continue this management.

### POSTPARTUM GLUCOSE TESTING

— The rationale for delayed postpartum glucose testing (at 6–12 weeks) of women with prior GDM is based on five sets of facts (Table 1). The

first is the prevalence of abnormal results by 3 months postpartum (cited references published since the last International GDM Workshop in 1998: 22–33). Impaired fasting glucose (IFG) is defined as FPG  $\geq 100$  or  $\geq 110$  mg/dl ( $\geq 5.6$  or  $\geq 6.1$  mmol/l), depending on study and guideline (14,34,35). IGT is defined as a 75-g glucose tolerance test (GTT) 2-h plasma glucose of 140–199 mg/dl (7.8–11.0 mmol/l). Diabetes is defined as repeated FPG  $\geq 126$  mg/dl ( $\geq 7$  mmol/l) or 2-h glucose  $\geq 200$  mg/dl ( $\geq 11.1$  mmol/l) (14,34,35). The prevalence of isolated IFG is 3–6%, that of IGT is 7–29%, and that of diabetes is 5–14% 4–20 weeks after pregnancy in women who were diagnosed with GDM and received treatment during gestation (Table 2). The variance in prevalence may depend on the frequency of obesity in the sample and different diagnostic standards for GDM in the pregnancy, but does not seem to depend much on geographic location of the study. The majority of recent studies of early postpartum follow-up after GDM yield an IGT prevalence of 17–23%.

The second reason to identify glucose intolerance after pregnancy is that abnormal test results identify women at increased risk of developing type 1 diabetes or especially type 2 diabetes over 1–15 years follow-up (cited references published since the last International GDM Workshop in 1998: 36–46). Systematic reviews of older studies conclude that 35–60% of subjects develop type 2 diabetes by 10–20 years after a GDM pregnancy, at rates much greater than control groups who did not have glucose intolerance during pregnancy (47–49). The higher rates were in studies of particular ethnic groups in the U.S. Recently, follow-up programs elsewhere also have identified increasing rates of type 2 diabetes by 5–10 years after GDM (Table 2): 9–43% type 2 diabetes in Europe (37,40–42,45,46) and 11–21% in Asia (38,43,44). The frequency of type 2 diabetes is influenced by

BMI, weight gain after pregnancy, family history of diabetes, fasting and postchallenge glucose levels during and after pregnancy, postpartum insulin resistance and inadequate  $\beta$ -cell secretion, and the need for pharmacological treatment during pregnancy (24,27–30,36,38,42,46,50–52). However, the risk factors are unable to predict all cases of subsequent type 2 diabetes: the biggest risk factor is a GDM pregnancy. The prevalence of type 1 diabetes identified 1–10 years after GDM in mostly European studies is 2.3–9.3% (Table 2) (40–42,45) and can usually be predicted by detection of  $\beta$ -cell–related autoantibodies during or after the GDM pregnancy (26,46,53–58).

The important third reason to identify glucose abnormalities postpartum is that six randomized clinical trials demonstrate the benefit of several interventions (diet and exercise 30–60 min daily at least 5 days per week, acarbose, metformin, or peroxisome proliferator-activated receptor- $\gamma$  agonists: thiazolidinediones, “glitazones”) in delaying or preventing type 2 diabetes in women with glucose intolerance (59–72). These trials are reviewed elsewhere in this supplement (73).

The fourth reason is that women with prior GDM have a high frequency of CVD risk factors (30,43,46). Reduction of type 2 diabetes in these women should be of great health benefit (74–77), since coronary heart disease, heart failure, stroke, and their associated mortality are common in this population (78). Clinical trials are ongoing to test this hypothesis. Intensified multifactorial treatment of type 2 diabetes already present is of demonstrated benefit in reducing diabetic and cardiovascular complications (79). Clinical trials are also needed to determine the best methods to reduce CVD risk factors in women with prior GDM and to measure the impact on long-term health.

The fifth reason to predict or identify diabetes after GDM, but not least important, is that women with undiagnosed hyperglycemia entering subsequent pregnancy have high rates of major congenital malformations in their infants (80–83), which can be reduced by planning pregnancy and using intensified preconception care of diabetes (84,85). Unfortunately, for many reasons, women with type 2 diabetes have been less likely to use preconception care (83,86,87), so major public efforts are required to improve this dangerous situation.

**Table 2—Observational studies published since 1998 identifying glucose abnormalities after pregnancies complicated by GDM (short- and longer-term follow-up)**

| Study                        | Region               | Number GDM followed | Follow-up after delivery | Percent isolated IFG | Percent IGT | Percent type 2 diabetes     |
|------------------------------|----------------------|---------------------|--------------------------|----------------------|-------------|-----------------------------|
| <b>Short-term follow-up</b>  |                      |                     |                          |                      |             |                             |
| Conway and Langer (22)       | Texas                | 179                 | 4–13 weeks               | 3.3*                 | 16.7        | 7.8                         |
| Ko et al. (23)               | China                | 801                 | 6 weeks                  | NA                   | 22.7        | 13.1                        |
| Pallardo et al. (24)         | Spain                | 788                 | 3–6 months               | 5.8*                 | 14.1        | 5.4                         |
| Costa et al. (25)            | Spain                | 120                 | 2–12 months              | 2.5*                 | 10.8        | 2.5                         |
| Bartha et al. (26)           | Spain                | 102                 | 3 months                 | NA                   | 6.9         | 8.8                         |
| Aberg et al. (27)            | Sweden               | 193                 | 12 months                | NA                   | 21.8        | 9.2                         |
| Schaefer-Graf et al. (28)    | California           | 1,636               | 1–4 months               | NA                   | 21.8†       | 14.1                        |
| Jang et al. (29)             | Korea                | 311                 | 6–8 weeks                | 2.3*                 | 23.2        | 16.7                        |
| Pallardo et al. (30)‡        | Spain                | 838                 | 3–6 months               | 4.8*                 | 10.4        | 3.5                         |
| Agarwal et al. (31)          | United Arab Emirates | 549                 | 4–8 weeks                | 5.5*                 | 15.3        | 9.1                         |
| Winzer et al. (32)           | Austria              | 98                  | 12 months                | 5.0§                 | 20.0        | 15.0                        |
| Lin et al. (33)              | China                | 127                 | >6 weeks                 | NA                   | 29.1        | 13.4                        |
| Current study                | California           | 527                 | 6–21 weeks               | 6.3§                 | 23.3        | 4.7                         |
| <b>Longer-term follow-up</b> |                      |                     |                          |                      |             |                             |
| Buchanan et al. (36)         | California           | 91                  | 1–2 years                | NA                   | NA          | 15.4                        |
| Kousta et al. (37)           | U.K.                 | 192                 | 1–86 months              | 9.4*                 | 27.1        | 24.0                        |
| Bian et al. (38)             | China                | 86                  | 5–10 years               | NA                   | 7.0         | 20.9                        |
| Linne et al. (39)            | Sweden               | 28                  | 15 years                 | NA                   | NA          | 35                          |
| Albareda et al. (40)         | Spain                | 352                 | 6 years                  | 7.1*                 | 17.3        | 11.1 (2.6% type 1 diabetes) |
| Cypryk et al. (41)           | Poland               | 193                 | 1–8 years                | 0.5*                 | 13.5        | 18.7 (9.3% type 1 diabetes) |
| Lauenborg et al. (42)        | Denmark              | 330                 | 6–10 years               | NA                   | 26.4†       | 37.0 (3.9% type 1 diabetes) |
| Cho et al. (43)              | Korea                | 170                 | 1–5 years                | NA                   | 25.3        | 10.6                        |
| Cheung and Helmink (44)      | Australia            | 102                 | 1–8 years                | NA                   | 16          | 29                          |
| Hunger-Dathe et al. (45)     | Germany              | 173                 | 2–10 years               | NA                   | 19.1†       | 9.2 (2.3% type 1 diabetes)  |
| Lobner et al. (46)           | Germany              | 302                 | 2–11 years               | NA                   | NA          | 43.1‡                       |

\*1997 American Diabetes Association criteria (34). †Includes IFG by 1997 American Diabetes Association criteria. ‡Some overlap with prior study. §2003 American Diabetes Association criteria (14). ‡May include type 1 diabetes. NA, not available.

The purpose of delayed postpartum glucose testing is to identify any type of glucose abnormality present: IFG, IGT, type 1 diabetes, or type 2 diabetes (14). Both isolated IFG and isolated IGT predict (to different degrees) later risks of type 2 diabetes and of CVD, and combined IFG-IGT generally has the greatest predictive power (30,88–99). There has been debate about the applicability and efficacy of different types of glucose testing in the postpartum state. It is claimed that the greater stability and reproducibility of FPG compared with GTT suggests that FPG would be more easily and widely applied for clinical screening and diagnosis (14). In the case of women with GDM, the pregnancy has already been the screening test for “glucose abnormality,” so what is needed after GDM is a diagnostic test. It is generally agreed that random glucose testing is not systematic and that assays for glycosylated hemoglobin or proteins are not sensitive to moderate hyperglycemia or glucose intolerance (14).

### **CURRENT STUDY: FAILURE OF FPG TO IDENTIFY CASES OF IGT OR TYPE 2 DIABETES 6–21 WEEKS AFTER PREGNANCY IN A MULTIETHNIC POPULATION**

In San Jose, CA, we evaluated the yield of postpartum 2-h 75-g GTTs performed in clinical laboratories in a multiethnic population of women with GDM treated during 2000–2003. GDM was diagnosed by private clinicians based on a 50-g 1-h glucose screening test value >199 mg/dl (>11.1 mmol/l) or a 100-g 3-h GTT with any two values  $\geq$ 95 mg/dl fasting, 1-h 180 mg/dl, 2-h 155 mg/dl, and 3-h 140 mg/dl (5.3, 10.0, 8.6, 7.8 mmol/l, respectively) (14). Patients were then referred to one of two diabetes and pregnancy education and treatment centers for coordinated multidisciplinary management under the supervision of one physician. All patients were trained in daily fingerstick capillary self-monitoring of blood glucose at fasting and 1 hour after main

meals. All patients received medical nutrition therapy from registered dietitians and were trained to keep daily food records of carbohydrate intake in their own languages. They were taught to use daily planned physical activity whenever possible. When the majority of glucose values exceeded 99 mg/dl (5.5 mmol/l) fasting or 129 mg/dl (7.2 mmol/l) postprandial in any given week, medical therapy was instituted with glyburide (26.6%) or one of several insulin regimens (36.8%). If hyperglycemia exceeded the stated limits using glyburide therapy up to a maximum of 20 mg/day, patients were changed to insulin therapy (45.7% of those on glyburide), with dosage adjusted sequentially as needed. All patients were given laboratory requisitions before delivery and encouraged to go for a postpartum 75-g 2-h GTT at 6–12 weeks after delivery, with the timing depending on the continuation of their health insurance coverage.

Of 527 women with GDM complet-

**Table 3—Ethnicity and postpartum glucose abnormalities on 75-g 2-h GTTs 6–21 weeks after delivery in women with prior GDM in San Jose, CA**

| Ethnic group        | Normal GTT | Isolated IFG | Isolated IGT | Combined IFG-IGT | Type 2 diabetes | Total |
|---------------------|------------|--------------|--------------|------------------|-----------------|-------|
| Asian Indian        | 51 (66.2)  | 5            | 9            | 8                | 4               | 77    |
| Far East Asian      | 48 (51.1)  | 10           | 26           | 6                | 4               | 94    |
| Southeast Asian     | 105 (68.2) | 7            | 26           | 10               | 6               | 154   |
| Hispanic            | 64 (66.7)  | 3            | 15           | 9                | 5               | 96    |
| Non-Hispanic white* | 78 (73.6)  | 8            | 11           | 3                | 6               | 106   |
| Total               | 346 (65.7) | 33 (6.3)     | 87 (16.5)    | 36 (6.8)         | 25 (4.7)        | 527   |

Data are n or n (%). \*Caucasian: European, Russian, or Middle Eastern origin.

ing the postpartum testing at 5–21 weeks after delivery, the GTTs were diagnostic of isolated IFG in 6.3%, isolated IGT in 16.5%, combined IFG-IGT in 6.8%, and type 2 diabetes in 4.7% (14). Thus, 34.3% of the group demonstrated postpartum glucose abnormalities, a rate similar to those in other recent U.S. reports (22,28). Only 4 of the 25 women (16%) diagnosed with type 2 diabetes had an FPG  $\geq 126$  mg/dl ( $\geq 7$  mmol/l) on the GTT. The results of the postpartum GTTs in the different ethnic groups are presented in Table 3 (100). There were just a few black/African-American, Native American, and Pacific Islander women in this population, and they were excluded from the analysis. It is apparent that postpartum glucose abnormalities were common (26.4–48.9%) in all represented ethnic groups.

Prepregnancy BMI (101,102) was atypical in this population of women with GDM in that 60.1% had BMI  $< 25$  kg/m<sup>2</sup>, 25.6% were overweight (BMI 25–29.9 kg/m<sup>2</sup>), and only 14.3% were obese (BMI  $\geq 30$  kg/m<sup>2</sup>), probably because of the high proportion of Far East and Southeast Asian women (only 0.9% obese by National Institutes of Health standards). It has been suggested that specific BMI classifications should be validated for Asian women in the U.S. (103,104). Postpartum glucose abnormalities were of similar frequency in all the prepregnancy BMI categories: 33.4% with BMI  $< 25$  kg/m<sup>2</sup>, 36.2% in those overweight, and

35.2% in the obese group. The distribution of postpartum glucose abnormalities in the BMI categories of the represented ethnic groups is presented in Table 4. Even in Caucasian and Hispanic women, postpartum glucose abnormalities were common (19 and 26%, respectively) in the groups with BMI  $< 25$  kg/m<sup>2</sup>, although they were more common in groups with BMI  $\geq 30$  kg/m<sup>2</sup>.

Postpartum glucose abnormalities were found in all GDM treatment groups, although there was the expected variation in frequency with increasing intensity of treatment required to maintain normoglycemia (Table 5). For women with prior GDM not requiring pharmacotherapy during pregnancy, 20.9% had postpartum GTT abnormalities (mostly IGT). Previous investigators demonstrated many antepartum and postpartum predictors of a higher rate of type 2 diabetes after pregnancy. These predictors include advanced maternal age, elevated BMI in some studies, the degree of fasting and postchallenge hyperglycemia during or after pregnancy, earlier diagnosis of GDM, the need for pharmacotherapy, and poor pancreatic  $\beta$ -cell compensation for increased insulin resistance (26,28, 29,36,40,43,105–108). These predictors are not to be denied, but many so-called “low-risk” women with prior GDM also have postpartum glucose abnormalities, so we recommend universal testing at 6–12 weeks or later after pregnancy. Although lactation may improve glucose

tolerance (109–111), neither breastfeeding status nor use of low-dose combination oral contraceptives influenced the diagnosis of postpartum glucose abnormalities in the present and other studies (105,112–114). Progestin-only preparations were not used in this population.

In our analysis of women with prior GDM, impaired fasting glucose (FPG  $\geq 100$  mg/dl,  $\geq 5.6$  mmol/l) (14) was not sensitive (34%) in identifying IGT and type 2 diabetes on the postpartum GTTs, although of course it identifies its own category of glucose abnormality (Table 6). Regarding type 2 diabetes only, 44% had FPG  $< 100$  mg/dl ( $< 5.6$  mmol/l) on the GTT. The lack of sensitivity of FPG persisted among the different ethnic groups and BMI categories (data not shown). The two-by-two tables show that lower values of FPG set at  $\geq 95$  or  $\geq 90$  also miss a substantial number of cases (51 and 38%, respectively) of IGT + type 2 diabetes. All other studies but one (115) also show that postpartum IFG has low sensitivity of predicting “postprandial” glucose intolerance and type 2 diabetes after pregnancy (22,25,30,31,37,41, 116,117) and at other times in women (93,96,118–121). Therefore, the 75-g GTT with fasting and 2-h glucose measurements is the best diagnostic test to identify important glucose abnormalities after pregnancy in women with prior GDM. Use of the simpler FPG test alone is not recommended.

**MANAGEMENT OF IGT AFTER PREGNANCY** — How should the clinician manage the woman with prior GDM and IGT identified after pregnancy? Certainly weight loss or weight maintenance medical nutrition therapy and 30–60 min exercise daily at least 5 days per week should be applied (64,76). The 2-h 75-g GTT should be repeated at some interval, since it can revert to normal or abnormal “spontaneously.” For women with persisting IGT after a good effort of medical nutrition therapy and planned physical activity, clinical trials support the clinician adding pharmacotherapy (73,74,122). Acarbose delays carbohydrate absorption and helps with postprandial glucose control, but side effects limit usage (123). Metformin decreases hepatic glucose production and lipid oxidation, improves peripheral tissue insulin sensitivity and helps with weight loss (123,124). Thiazolidinediones (glitazones) as peroxisome proliferator-activated receptor- $\gamma$  agonists increase

**Table 4—Cross-tabulation of pre-pregnancy BMI, ethnic groups, and 6- to 21-week postpartum glucose abnormalities in women with prior GDM in San Jose, CA**

| BMI (kg/m <sup>2</sup> ) | Asian Indian | Far East Asian | Southeast Asian | Hispanic  | Caucasian |
|--------------------------|--------------|----------------|-----------------|-----------|-----------|
| $< 25$                   | 51.4 (35)    | 78.4 (46)      | 82.5 (31)       | 28.1 (26) | 51.0 (19) |
| 25–29.9                  | 32.4 (28)    | 21.6 (60)      | 16.1 (40)       | 41.7 (35) | 21.6 (35) |
| $\geq 30$                | 16.2 (42)    | 0              | 1.5 (0)         | 30.2 (38) | 27.5 (34) |

Data are percent of cases in different BMI categories (percent with abnormal glucose tolerance).

**Table 5—Frequency of postpartum glucose abnormalities according to GDM treatment group (San Jose data)**

| Treatment group     | n   | Normal GTT (%) | Isolated IFG (%) | IGT (%) | Type 2 diabetes (%) |
|---------------------|-----|----------------|------------------|---------|---------------------|
| MNT only            | 192 | 79.1           | 1.8              | 17.2    | 1.9                 |
| Glyburide           | 77  | 62.5           | 4.7              | 31.2    | 1.6                 |
| Glyburide > insulin | 64  | 49.1           | 8.5              | 35.6    | 6.8                 |
| Insulin             | 194 | 59.3           | 9.5              | 23.8    | 7.4                 |

MNT, medical nutrition therapy.

insulin sensitivity and may improve lipid balance and cardiovascular and renal function (72,125–127). Metformin and glitazones may help “take the load off” the overworked pancreatic  $\beta$ -cells (75,128). As noted above, it is important to identify and control type 2 diabetes before a subsequent pregnancy. This may justify continued follow-up in the gynecological setting of women with the potential to become pregnant, or close collaboration with other physicians.

Published data are less helpful in deciding management of women with isolated IFG. At least follow-up with delayed repeat GTT testing is justified, since IFG predicts risk of development of impaired glucose tolerance or type 2 diabetes (71) and perhaps risk of CVD (88,89,96).

### CARDIOVASCULAR RISKS IN WOMEN WITH PRIOR GDM

**GDM**—The question arises whether and how to evaluate CVD risk markers in women with glucose abnormalities persisting after pregnancies with GDM. Inflammatory processes are now known to contribute to atherosclerosis (129,130). Research continues on the role of lipoproteins, cytokines, oxidative stress, loss of nitric oxide bioactivity in the vessel wall (131), and effects of angiotensin and aldosterone (132,133). Addition of LDL subfractions (to detect small dense particles, LDL phenotype B) to the standard lipid profile may help in predicting risk of

CVD events (68). Assays of inflammatory markers for potential clinical use include white blood cells, soluble adhesion molecules, cytokines (the interleukins and tumor necrosis factor- $\alpha$ ), and acute-phase reactants (fibrinogen and highly sensitive C-reactive protein [hsCRP]) (134). C-reactive protein is a correlate of obesity in women with GDM (135). The American Heart Association/Centers for Disease Control Scientific Statement concluded that class IIA evidence supported use of hsCRP as the best inflammatory marker currently available (134). “Other inflammatory markers (cytokines, other acute-phase reactants) should not be measured for the determination of coronary risk in addition to hsCRP.” Measurement of hsCRP using standardized assays should be done (in the absence of current infection or estrogen/progestogen hormone use) “twice (averaging results), optimally 2 weeks apart, fasting or nonfasting in metabolically stable patients. If hsCRP level is  $>10$  mg/l, the test should be repeated and the patient examined for sources of infection or inflammation.” Otherwise, hsCRP levels are categorized as low risk ( $<1$  mg/l), average risk (1.0–3.0 mg/l), and high risk ( $>3.0$  mg/l) (134).

Several investigators have studied lipids in women with previous GDM. Latina women diagnosed with IGT 6–12 weeks after pregnancies with GDM in Los Angeles showed elevated triglycerides com-

pared with GDM women with normal glucose tolerance postpartum. The women with IGT destined to develop type 2 diabetes by 36 months also initially demonstrated reduced HDL cholesterol. LDL cholesterol levels were not different postpartum in any of the GDM groups compared with control subjects, but LDL subfractions were not reported (136). The authors concluded that factors other than lipids might contribute to the high prevalence of cardiovascular morbidity in a similar cohort of women with prior GDM followed for 12–18 years in Los Angeles (137). A total of 56 former GDM mothers without IFG or IGT studied 5–6 years after pregnancy in Rhode Island had significantly increased proportions of subjects with elevated total cholesterol (39%), elevated LDL cholesterol (13%), and systolic blood pressure  $>140$  mmHg (9%) compared with control subjects with similar BMI distribution (138). Elevated triglycerides and LDL cholesterol levels 6–11 years after pregnancy were also noted in women with prior GDM compared with control subjects with similar glucose and BMI parameters in Boston (139). Women with prior GDM were more likely to have elevated triglycerides and low HDL cholesterol than a control group in Denmark (140). Increased intramyocellular lipid concentration identified IGT in Austrian women with prior GDM, compared with a glucose-tolerant control group (141). In Asia, total cholesterol, LDL cholesterol, and triglycerides were significantly higher, and HDL cholesterol was significantly lower in 801 women with prior GDM versus control subjects after adjustment for age, BMI, and smoking (23), but only triglycerides discriminated between IGT and normal glucose tolerance in the women who had GDM (23,43).

On the other hand, standard lipoprotein concentrations were not different in women with prior GDM compared with

**Table 6—Predictive value of FPG measurements on postpartum oral GTT to identify 2-h glucose abnormalities (San Jose data)**

| FPG values (mg/dl) | IGT + type 2 diabetes | 2-h glucose normal | Predictive values of FPG $\geq 100$ mg/dl | Predictive values of FPG $\geq 95$ mg/dl | Predictive values of FPG $\geq 90$ mg/dl |
|--------------------|-----------------------|--------------------|-------------------------------------------|------------------------------------------|------------------------------------------|
| $\geq 100$         | 50                    | 33                 | Sensitivity 0.338                         | Sensitivity 0.486                        | Sensitivity 0.623                        |
| $\geq 95$          | 72                    | 66                 | Specificity 0.913                         | Specificity 0.826                        | Specificity 0.646                        |
| $\geq 90$          | 92                    | 134                |                                           |                                          |                                          |
| $< 100$            | 98                    | 346                | PPV* 0.602                                | PPV 0.522                                | PPV 0.417                                |
| $< 95$             | 76                    | 313                | PNV† 0.779                                | PNV 0.805                                | PNV 0.814                                |
| $< 90$             | 56                    | 245                |                                           |                                          |                                          |

\*Predictive value of a positive test; †predictive value of a negative test.

control subjects 1–3 years after pregnancy in Italy (142) and in Spain, despite the increased BMI and waist circumference (30). In the latter study, women with IFG had significantly increased odds ratios for obesity and hypertension than the women with postpartum IGT (30). Also in Spain, the only lipid abnormality was increased VLDL cholesterol levels at a 5-year follow-up of 262 women with prior GDM (143). Similar concentrations of plasma lipids were found in white nonobese women with prior GDM and in control subjects matched for age, BMI, and waist-to-hip ratio in a retrospective case-control study in Brazil (52) and in a similar study in China (33). More research is needed on lipid abnormalities in women with prior GDM, with or without IFG and IGT, and the relationship to subsequent CVD.

Recent studies of insulin resistance and components of the “metabolic syndrome” in women with prior GDM suggest that a chronic systemic inflammatory response may be present in glucose-intolerant women and may be an early feature of the cluster of CVD risk factors known as the metabolic syndrome (144–147). A total of 23 women studied 1–10 years after pregnancy with GDM in New England had higher mean levels of BMI, waist circumference, triglycerides, hsCRP, and interleukin-6 compared with 23 control subjects (148). Insulin sensitivity was similar to control subjects in women with prior GDM in Barcelona, but insulin secretion was lower and waist circumference was higher, and the proportion with blood pressure >130/85 mmHg was 42 versus 29% in the control subjects (143). Average hsCRP and interleukin-6, but not tumor necrosis factor- $\alpha$ , were higher in a prior GDM group than in control subjects 3 months after delivery in Austria, with or without direct measures of insulin resistance (149). In Italy, hsCRP and fibrinogen concentrations were significantly elevated in women 1–3 years after pregnancy with GDM, even excluding women with IGT (142). Gestational hyperglycemia predicted a high risk of later metabolic syndrome after adjustments for age and prepregnancy BMI in another Italian study (150). In the large 4- to 23-year follow-up program in Denmark, the prior GDM group of 481 women had 68% impaired glucose regulation, 59% elevated fasting serum insulin, 54% central obesity, 28% hypertension, and 35% dyslipidemia, mainly characterized by elevated triglycerides and reduced

HDL cholesterol. Inflammatory markers were not measured (140). Total plasma homocysteine level was a risk factor for the development of diabetes after GDM in Korea (43). As with lipids, continuing investigation of the metabolic syndrome CVD risk factors is justified after GDM, to determine the likelihood of CVD events and means of their prevention.

**CONCLUSIONS**— The initial postpartum management of women with GDM should focus on maternal-infant well-being, encouragement and training for healthy nutrition, planned physical activity, weight reduction as needed, continued smoking cessation, breastfeeding, and provision of appropriate contraception. We conclude that women with prior GDM have substantial rates of IFG, IGT, and type 2 diabetes after pregnancy best identified by a 75-g 2-h oral GTT 6–12 weeks or later postpartum. Continued prolonged follow-up is indicated to 1) offer and apply treatment in women with IGT designed to delay or prevent development of type 2 diabetes, 2) follow women with IFG or normal GTT to detect later conversion to IGT or type 2 diabetes (more research is needed to better define the conversion rate in women receiving appropriate advice on nutrition and physical activity 30–60 min daily at least 5 days per week), and 3) identify diabetes for intensified treatment before a subsequent pregnancy to lower the risk of major congenital malformations in their infants.

During pregnancy women with GDM should be educated that glucose intolerance may not be temporary, that it can be modified by behavior changes and that postpartum testing will be important. Presuming an increased risk for cardiovascular events in glucose-intolerant women with prior GDM (151), large long-term follow-up studies are needed to identify the frequency and value of CVD risk markers and to determine if interventions (antioxidants, aspirin, behavior modification, glucose and blood pressure control, and specific pharmacological agents) can reduce the frequency or mortality of coronary heart disease, heart failure, or stroke in these women. Recent reports of low rates of postpartum glucose tolerance testing (152,153) and of lifestyle modification (154–158) in women with prior GDM show that a dramatic paradigm shift in clinical practice is necessary to improve the lifelong health of these women.

## References

1. Kjos SL: Postpartum care of the woman with diabetes. *Clin Obstet Gynecol* 43:75–86, 2000
2. Adams KM, Li H, Nelson RL, Ogburn PL Jr, Danilenko-Dixon DR: Sequelae of unrecognized gestational diabetes. *Am J Obstet Gynecol* 178:1321–1332, 1998
3. Yang X, Hsu-Hage B, Zhang H, Zhang C, Zhang Y, Zhang C: Women with impaired glucose tolerance during pregnancy have significantly poor pregnancy outcomes. *Diabetes Care* 25:1619–1624, 2002
4. Hedderson MM, Ferrara A, Sacks DA: Gestational diabetes mellitus and lesser degrees of pregnancy hyperglycemia: association with increased risk of spontaneous preterm birth. *Obstet Gynecol* 102:850–856, 2003
5. Myles TD: An expanded description of delivery-related maternal morbidity for diabetic patients. *Obstet Gynecol* 101 (Suppl.):38S, 2003
6. Crowther CA, Hiller JE, Moss JR, McPhee AJ, Jeffries WS, Robinson JS, for the Australian Carbohydrate Intolerance Study in Pregnant Women: Effect of treatment of gestational diabetes mellitus on pregnancy outcomes. *N Engl J Med* 352:2477–2486, 2005
7. Langer O, Yogev Y, Most O, Xenakis EMJ: Gestational diabetes: the consequences of not treating. *Am J Obstet Gynecol* 192:989–997, 2005
8. Saydah SH, Chandra A, Eberhardt MS: Pregnancy experience among women with and without gestational diabetes in the U.S.: 1995 National Survey of Family Growth. *Diabetes Care* 28:1035–1040, 2005
9. Kitzmiller JL, Elixhauser A, Carr S, Major CA, De Veciana M, Dang-Kilduff L, Weschler JM: Assessment of costs and benefits of management of gestational diabetes mellitus. *Diabetes Care* 21 (Suppl. 2):B123–B130, 1998
10. Svarre JA, Hansen BB, Molsted-Pedersen L: Perinatal complications in women with gestational diabetes mellitus: significance of a diagnosis early in pregnancy. *Acta Obstet Gynecol Scand* 80:899–904, 2001
11. American Dietetic Association: Position of the American Dietetic Association: promoting and supporting breastfeeding. *J Am Diet Assoc* 105:810–818, 2005
12. Gunderson EP: Breastfeeding after gestational diabetes pregnancy: subsequent obesity and type 2 diabetes in women and their offspring. *Diabetes Care* 30 (Suppl. 2):S161–S168, 2007
13. Damm P, Mathiesen ER, Petersen KR, Kjos S: Contraception after gestational diabetes. *Diabetes Care* 30 (Suppl. 2):S236–S241, 2007
14. Expert Committee on the Diagnosis and Classification of Diabetes Mellitus: Fol-

- low-up report on the diagnosis of diabetes mellitus. *Diabetes Care* 26:3160–3167, 2003
15. Feig DS, Briggs GG, Kraemer JM, Ambrose PJ, Moskovitz DN, Nageotte M, Donat DJ, Padilla G, Wan S, Klein J, Koren G: Transfer of glyburide and glipizide into breast milk. *Diabetes Care* 28:1851–1855, 2005
  16. Hale TW, Kristensen JH, Hackett LP, Kohan R, Ilett KF: Transfer of metformin into human milk. *Diabetologia* 45:1509–1514, 2002
  17. Gardiner SJ, Kirkpatrick CMJ, Begg EJ, Zhang M, Moore MP, Saville DJ: Transfer of metformin into human milk. *Clin Pharmacol Ther* 73:71–77, 2003
  18. Briggs GG, Ambrose PJ, Nageotte MP, Padilla G, Wan S: Excretion of metformin into breast milk and the effect on nursing infants. *Obstet Gynecol* 105:1437–1441, 2005
  19. Merlob P, Levitt O, Stahl B: Oral antihyperglycemic agents during pregnancy and lactation. *Pediatr Drugs* 4:755–760, 2002
  20. Creager MA, Luescher TF, Cosentino F, Beckman JA: Diabetes and vascular disease: pathophysiology, clinical consequences, and medical therapy: part I. *Circulation* 108:1527–1532, 2003
  21. Luescher TF, Creager MA, Beckman JA, Cosentino F: Diabetes and vascular disease: pathophysiology, clinical consequences, and medical therapy: part II. *Circulation* 108:1655–1661, 2003
  22. Conway DL, Langer O: Effects of new criteria for type 2 diabetes on the rate of postpartum glucose intolerance in women with gestational diabetes. *Am J Obstet Gynecol* 181:610–614, 1999
  23. Ko GTC, Chan JCN, Tsang LWW, Li C-Y, Cockram CS: Glucose tolerance and other cardiovascular risk factors in Chinese women with a history of gestational diabetes. *Aust N Z J Obstet Gynecol* 39:478–483, 1999
  24. Pallardo F, Herranz L, Garcia-Ingelmo T, Grande C, Martin-Vaquero P, Janez M, Gonzalez A: Early postpartum metabolic assessment with prior gestational diabetes. *Diabetes Care* 22:1053–1058, 1999
  25. Costa A, Carmona F, Martinez-Roman S, Quinto L, Levy I, Conget I: Post-partum reclassification of glucose tolerance in women previously diagnosed with gestational diabetes. *Diabet Med* 17:595–598, 2000
  26. Bartha JL, Martinez-del-Fresno P, Comino-Delgado R: Postpartum metabolism and autoantibody markers in women with gestational diabetes mellitus diagnosed in early pregnancy. *Am J Obstet Gynecol* 184:965–970, 2001
  27. Aberg AEB, Jonsson EK, Eskilsson I, Landin-Olsson M, Frid AH: Predictive factors of developing diabetes mellitus in women with gestational diabetes. *Acta Obstet Gynecol Scand* 81:11–16, 2002
  28. Schaefer-Graf UM, Buchanan TA, Xiang AH, Peters RK, Kjos SL: Clinical predictors for a high risk for the development of diabetes mellitus in the early puerperium in women with recent gestational diabetes mellitus. *Am J Obstet Gynecol* 186:751–756, 2002
  29. Jang HC, Yim C-H, Han KO, Yoon H-K, Han I-K, Kim M-Y, Yang J-H, Cho NH: Gestational diabetes mellitus in Korea: prevalence and prediction of glucose intolerance at early postpartum. *Diabetes Res Clin Pract* 61:117–124, 2003
  30. Pallardo LF, Herranz L, Martin-Vaquero P, Garcia-Ingelmo T, Grande C, Janez M: Impaired fasting glucose and impaired glucose tolerance in women with prior gestational diabetes are associated with a different cardiovascular profile. *Diabetes Care* 26:2318–2322, 2003
  31. Agarwal MM, Punnoose J, Dhatt GS: Gestational diabetes: implications of variation in post-partum follow-up criteria. *Eur J Obstet Gynecol Reprod Sci* 113:149–153, 2004
  32. Winzer C, Pacini G, Tura A, Wagner OF, Waldhausel W, Kautsky-Willer A: Changes in glucose tolerance in women with previous gestational diabetes within one year after delivery: the Viennese Post-Gestational Diabetes Project. *Diabetologia* 47 (Suppl. 1):A358, 2004
  33. Lin CH, Wen SF, Wu YH, Huang YY, Huang MJ: The postpartum metabolic outcome of women with previous gestational diabetes mellitus. *Chang Gung Med J* 28:794–800, 2005
  34. Expert Committee on the Diagnosis and Classification of Diabetes Mellitus: Report of the Expert Committee on the Diagnosis and Classification of Diabetes Mellitus. *Diabetes Care* 20:1183–1197, 1997
  35. Alberti KGMM, Zimmet PZ, the WHO Consultation: Definition, diagnosis, and classification of diabetes mellitus and its complications. Part 1. Diagnosis and classification of diabetes mellitus: provisional report of a WHO consultation. *Diabet Med* 15:539–553, 1998
  36. Buchanan TA, Xiang AH, Kjos SL, Trigo E, Lee WP, Peters RK: Antepartum predictors of the development of type 2 diabetes in Latino women 11–26 months after pregnancies complicated by gestational diabetes. *Diabetes* 48:2430–2436, 1999
  37. Kousta E, Lawrence NJ, Penny A, Millauer BA, Robinson S, Dornhorst A, de Swiet M, Steer PJ, Grenfell A, Mather HM, Johnston DG, McCarthy MI: Implications of new diagnostic criteria for abnormal glucose homeostasis in women with previous gestational diabetes. *Diabetes Care* 22:933–937, 1999
  38. Bian X, Gao P, Xiong X, Xu H, Qian M, Liu S: Risk factors for development of diabetes mellitus in women with a history of gestational diabetes mellitus. *Chinese Med J* 113:759–762, 2000
  39. Linne Y, Barkeling B, Rossner S: Natural course of gestational diabetes mellitus: long-term follow-up of women in the SPAWN study. *BJOG* 109:1227–1231, 2002
  40. Albareda M, Caballero A, Badell G, Piquer S, Ortiz A, de Leiva A, Corcoy R: Diabetes and abnormal glucose tolerance in women with previous gestational diabetes. *Diabetes Care* 26:1199–1205, 2003
  41. Cypryk K, Czupryniak L, Wilczynski J, Lewinski A: Diabetes screening after gestational diabetes mellitus: poor performance of fasting plasma glucose. *Acta Diabetol* 41:5–8, 2004
  42. Lauenborg J, Hansen T, Jensen DM, Vestergaard H, Molsted-Pedersen L, Hornnes P, Loch H, Pedersen O, Damm P: Increasing incidence of diabetes after gestational diabetes: a long-term follow-up in a Danish population. *Diabetes Care* 27:1194–1199, 2004
  43. Cho NH, Lim S, Jang HC, Park HK, Metzger BE: Elevated homocysteine as a risk factor for the development of diabetes in women with a previous history of gestational diabetes mellitus: a 4-year prospective study. *Diabetes Care* 28:2750–2755, 2005
  44. Cheung NW, Helmink D: Gestational diabetes: the significance of persistent fasting hyperglycemia for the subsequent development of diabetes mellitus. *J Diabetes Complications* 20:21–25, 2006
  45. Hunger-Dathe W, Mosebach N, Samann A, Wolf G, Muller UA: Prevalence of impaired glucose tolerance 6 years after gestational diabetes. *Exp Clin Endocrinol Diabetes* 114:11–17, 2006
  46. Lobner K, Knopff A, Baumgarten A, Mollenhauer U, Marienfeld S, Garrido-Franco M, Bonifacio E, Ziegler A-G: Predictors of postpartum diabetes in women with gestational diabetes mellitus. *Diabetes* 55:792–797, 2006
  47. Kim C, Newton KM, Knopp RH: Gestational diabetes and the incidence of type 2 diabetes: a systematic review. *Diabetes Care* 25:1862–1868, 2002
  48. Cheung NW, Byth K: Population health significance of gestational diabetes. *Diabetes Care* 26:2005–2009, 2003
  49. Ben-Haroush A, Yogev Y, Hod M: Epidemiology of gestational diabetes mellitus and its association with type 2 diabetes. *Diabet Med* 21:103–113, 2004
  50. Kautzky-Willer A, Prager R, Waldhausel W, Pacini G, Thomaseth K, Wagner OF, Ulm M, Strelci C, Ludvik B: Pronounced insulin resistance and inadequate beta-cell secretion characterize lean gestational diabetes during and after

- pregnancy. *Diabetes Care* 20:1717–1723, 1997
51. Kousta E, Lawrence NJ, Godsland IF, Penny A, Anyaoku V, Millauer BA, Cela E, Johnston DG, Robinson S, McCarthy MI: Insulin resistance and beta-cell dysfunction in normoglycemic European women with a history of gestational diabetes. *Clin Endocrinol (Oxf)* 59:289–297, 2003
  52. Pimenta WP, Calderon IM, Cruz NS, Santos ML, Aragon FF, Padovani CR: Subclinical abnormalities of glucose metabolism in Brazilian women with a history of gestational diabetes mellitus. *Acta Obstet Gynecol Scand* 83:1152–1158, 2004
  53. Catalano PM, Tyzbir ED, Sims EA: Incidence and significance of islet cell antibodies in women with previous gestational diabetes. *Diabetes Care* 13:478–482, 1990
  54. Damm P, Kuhl C, Buschard K, Jakobsen BK, Svegaard A, Sodoyez-Goffaux F, Shattock M, Bottazzo GF, Molsted-Pedersen L: Prevalence and predictive value of islet cell antibodies and insulin autoantibodies in women with gestational diabetes. *Diabet Med* 11:558–563, 1994
  55. Beischer NA, Wein P, Sheedy MT, Mackay IR, Rowley MJ, Zimmet P: Prevalence of antibodies to glutamic acid decarboxylase in women who have had gestational diabetes. *Am J Obstet Gynecol* 173:1563–1569, 1995
  56. Mauricio D, Corcoy R, Codina M, Morales J, Balsells M, de Leiva A: Islet cell antibodies and beta-cell function in gestational diabetic women: comparison to first-degree relatives of type 1 (insulin-dependent) diabetic subjects. *Diabet Med* 12:1009–1014, 1995
  57. Fuchtenbusch M, Ferber K, Standl E, Ziegler AG: Prediction of type 1 diabetes postpartum in patients with gestational diabetes mellitus by combined islet cell autoantibody screening: a prospective multicenter study. *Diabetes* 46:1459–1467, 1997
  58. Jarvela IY, Juutinen J, Koskela P, Hartikainen A-L, Kulmala P, Knip M, Tapanaianen JS: Gestational diabetes identifies women at risk for permanent type 1 and type 2 diabetes in fertile age: predictive role of autoantibodies. *Diabetes Care* 29:607–612, 2006
  59. Pan X, Li G, Hu Y, Wang J, Yang W, An Z, Hu Z, Lin J, Xia J, Cao H, Liu P, Jiang X, Jiang Y, Wang J, Zheng H, Zhang H, Bennet P, Howard B: Effects of diet and exercise in preventing NIDDM in people with impaired glucose tolerance. *Diabetes Care* 20:537–543, 1997
  60. Tuomilehto J, Lindstrom J, Eriksson J, Valle T, Hamalainen H, Ilanne-Parikka P, Keinanen-Kiukkaanniemi S, Laakso M, Louheranta A, Rastas M, Salminen V, Uusitupa M: Prevention of type 2 diabetes mellitus by changes in lifestyle among subjects with impaired glucose tolerance. *N Engl J Med* 344:1343–1349, 2001
  61. Buchanan T, Xiang A, Peters R, Kjos S, Marroquin A, Goico J, Ochoa C, Tan S, Berkowitz K, Hodis H, Azen S: Preservation of pancreatic  $\beta$ -cell function and prevention of type 2 diabetes by pharmacological treatment of insulin resistance in high-risk Hispanic women. *Diabetes* 51:2796–2803, 2002
  62. Chiasson J, Josse R, Gomis R, Hanefeld M, Karasik A, Laakso M: Acarbose for prevention of type 2 diabetes mellitus: the STOP-NIDDM randomized trial. *Lancet* 359:2072–2077, 2002
  63. Diabetes Prevention Program Research Group: Reduction in the incidence of type 2 diabetes with lifestyle intervention or metformin. *N Engl J Med* 346:393–403, 2002
  64. Diabetes Prevention Program (DPP) Research Group: The Diabetes Prevention Program (DPP): description of lifestyle intervention. *Diabetes Care* 25:2165–2171, 2002
  65. Diabetes Prevention Program Research Group: Effects of withdrawal from metformin on the development of diabetes in the Diabetes Prevention Program. *Diabetes Care* 26:977–980, 2003
  66. Xiang AH, Peters RK, Kjos SL, Goico J, Ochoa C, Marroquin A, Tan S, Hodis HN, Azen SP, Buchanan TA: Pharmacological treatment of insulin resistance at two different stages in the evolution of type 2 diabetes: impact on glucose tolerance and beta-cell function. *J Clin Endocrinol Med* 89:2846–2851, 2004
  67. Diabetes Prevention Program Research Group: Prevention of type 2 diabetes with troglitazone in the Diabetes Prevention Program. *Diabetes* 54:1150–1156, 2005
  68. Diabetes Prevention Program Research Group: Impact of intensive lifestyle and metformin therapy on cardiovascular disease risk factors in the Diabetes Prevention Program. *Diabetes Care* 28:888–894, 2005
  69. Diabetes Prevention Program Research Group: Intensive lifestyle intervention or metformin on inflammation and coagulation in participants with impaired glucose tolerance. *Diabetes* 54:1566–1572, 2005
  70. Diabetes Prevention Program Research Group: Role of insulin secretion and sensitivity in the evolution of type 2 diabetes in the Diabetes Prevention Program: effects of lifestyle intervention and metformin. *Diabetes* 54:2404–2414, 2005
  71. The DREAM (Diabetes Reduction Assessment with Ramipril and Rosiglitazone Medication) Trial Investigators: Effect of rosiglitazone on the frequency of diabetes in patients with impaired glucose tolerance or impaired fasting glucose: a randomized controlled trial. *Lancet* 368:1096–1105, 2006
  72. Xiang AH, Peters RK, Kjos SL, Marroquin A, Goico J, Ochoa C, Kawakubo M, Buchanan TA: Effect of pioglitazone on pancreatic  $\beta$ -cell function and diabetes risk in Hispanic women with prior gestational diabetes. *Diabetes* 55:517–522, 2006
  73. Ratner RE: Prevention of type 2 diabetes in women with previous gestation diabetes. *Diabetes Care* 30 (Suppl. 2):S242–S245, 2007
  74. American Diabetes Association and National Institute of Diabetes and Digestive and Kidney Diseases: The prevention or delay of type 2 diabetes (Position Statement). *Diabetes Care* 25:742–749, 2002
  75. Buchanan TA: Prevention of type 2 diabetes: what is it really? *Diabetes Care* 26:1306–1308, 2003
  76. Klein S, Sheard NF, Pi-Sunyer X, Daly A, Wylie-Rosett J, Kulkarni K, Clark NG: Weight management through lifestyle modification for the prevention and management of type 2 diabetes: rationale and strategies: a statement of the American Diabetes Association, the North American Association for the Study of Obesity, and the American Society of Clinical Nutrition. *Diabetes Care* 27:2067–2073, 2004
  77. Tuomilehto J, Wareham N: Glucose lowering and diabetes prevention: are they the same? (Commentary) *Lancet* 368:1218–1219, 2006
  78. Barrett-Connor E, Giardina EG, Gitt A, Gudat U, Steinberg HO, Tschoepe D: Women and heart disease: the role of diabetes and hyperglycemia. *Arch Intern Med* 164:934–942, 2004
  79. Gaede P, Vedel P, Larsen N, Jensen GV, Parving H-H, Pedersen O: Multifactorial intervention and cardiovascular disease in patients with type 2 diabetes. *N Engl J Med* 348:383–393, 2003
  80. Towner D, Kjos S, Leung B: Congenital malformations in pregnancies complicated by NIDDM. *Diabetes Care* 11:1446–1451, 1995
  81. Schaefer-Graf UM, Buchanan TA, Xiang A: Patterns of congenital anomalies and relationship to initial maternal fasting glucose levels in pregnancies complicated by type 2 and gestational diabetes. *Am J Obstet Gynecol* 182:313–320, 2000
  82. Farrell T, Neale L, Cindy T: Congenital anomalies in the offspring of women with type 1, type 2 and gestational diabetes. *Diabet Med* 19:322–326, 2002
  83. Dunne F, Brydon P, Smith K, Gee H: Pregnancy in women with type 2 diabetes: 12 years outcome data 1990–2002. *Diabet Med* 20:734–738, 2003
  84. Kitzmiller JL, Buchanan TA, Kjos S, Combs CA, Ratner RE: Pre-conception care of diabetes, congenital malforma-



- tions, and spontaneous abortions (Technical Review). *Diabetes Care* 19:514–541, 1996
85. MvElvy SS, Miodovnik M, Rosenn B, Khoury JC, Siddiqi T, Dignan PS, Tsang RC: A focused preconceptional and early pregnancy program in women with type 1 diabetes reduces perinatal mortality and malformation rates to general population levels. *J Matern Fetal Med* 9:14–20, 2000
  86. Cundy T, Gamble G, Townend K, Henley PG, MacPherson P, Roberts AB: Perinatal mortality in type 2 diabetes mellitus. *Diabet Med* 17:33–39, 2000
  87. Feig D, Palda V: Type 2 diabetes in pregnancy: a growing concern. *Lancet* 359:1690–1692, 2002
  88. Tominaga M, Eguchi H, Manaka H, Igarashi K, Kato T, Seikkawa A: Impaired glucose tolerance is a risk factor for cardiovascular disease, but not impaired fasting glucose: the Funagata Diabetes Study. *Diabetes Care* 22:920–924, 1999
  89. Davies MJ, Raymond NT, Day JL, Hales CN, Burden AC: Impaired glucose tolerance and fasting hyperglycemia have different characteristics. *Diabet Med* 17:433–440, 2000
  90. DECODE Study Group: Glucose tolerance and cardiovascular mortality: comparison of fasting and 2-hr diagnostic criteria. *Arch Intern Med* 161:397–405, 2001
  91. Esposito K, Nappo F, Marfella R, Giugliano G, Giugliano F, Ciotola M, Quagliaro L, Ceriello A, Giugliano D: Inflammatory cytokine concentrations are acutely increased by hyperglycemia [IGT] in humans: role of oxidative stress. *Circulation* 106:2067–2072, 2002
  92. Hanefeld M, Koehler C, Fuecker K, Henkel E, Schaper F, Temelkova-Kurktschiev T: Insulin secretion and insulin sensitivity pattern is different in isolated impaired glucose tolerance and impaired fasting glucose: the Risk Factor in Impaired Glucose Tolerance for Atherosclerosis and Diabetes Study. *Diabetes Care* 26:868–874, 2003
  93. McNeely MJ, Boyko EJ, Leonetti DL, Kahn SE, Fujimoto WY: Comparison of a clinical model, the oral glucose tolerance test, and fasting glucose for prediction of type 2 diabetes risk in Japanese Americans. *Diabetes Care* 26:758–763, 2003
  94. Schianca GPC, Rossi A, Sainaghi PP, Maduli E, Bartoli E: The significance of impaired fasting glucose versus impaired glucose tolerance: the importance of insulin secretion and resistance. *Diabetes Care* 26:1333–1337, 2003
  95. Blake DR, Meigs JB, Muller DC, Najjar SS, Andres R, Nathan DM: Impaired glucose tolerance, but not impaired fasting glucose, is associated with increased levels of coronary heart disease risk factors: results from the Baltimore Longitudinal Study on Aging. *Diabetes* 53:2095–2100, 2004
  96. Heldgaard PE, Olivarius NF, Hindsberger C, Henriksen JE: Impaired fasting glycemia resembles impaired glucose tolerance with regard to cardiovascular risk factors: population-based, cross-sectional study of risk factors for cardiovascular disease. *Diabet Med* 21:363–370, 2004
  97. Tai ES, Goh ES, Lee JJM, Wong M-S, Heng D, Hughes K, Chew SK, Cutter J, Chew W, Gu K, Chia KS, Tan CE: Lowering the criterion for impaired fasting glucose: impact on disease prevalence and associated risk of diabetes and ischemic heart disease. *Diabetes Care* 27:1728–1734, 2004
  98. Nichols GA, Brown JB: Higher medical care costs accompany impaired fasting glucose. *Diabetes Care* 28:2223–2229, 2005
  99. Vaccaro O, Riccardi G: Changing the definition of impaired fasting glucose: impact on the classification of individuals and risk definition. *Diabetes Care* 28:1786–1788, 2005
  100. National Center for Health Statistics and March of Dimes: *Peristats*. 2002, <http://peristats.modimes.org>
  101. National Institutes of Health, National Heart, Lung and Blood Institute: Clinical guidelines on the identification, evaluation and treatment of overweight and obesity in adults: the evidence report. *Obes Res* 6 (Suppl. 2):S51–S210, 1998
  102. Janssen I, Katzmarzyk PT, Ross R: Body mass index, waist circumference, and health risk: evidence in support of current National Institutes of Health guidelines. *Arch Intern Med* 162:2074–2079, 2002
  103. Snehaltha C, Viswanathan V, Ramachandran A: Cutoff values for normal anthropometric variables in Asian Indian adults. *Diabetes Care* 26:1380–1384, 2003
  104. WHO Expert Consultation: Appropriate body-mass index for Asian populations and its implications for policy and intervention strategies. *Lancet* 363:157–163, 2004
  105. Catalano PM, Vargo KM, Bernstein IM, Amini SB: Incidence and risk factors associated with abnormal postpartum glucose tolerance in women with gestational diabetes. *Am J Obstet Gynecol* 165:914–919, 1991
  106. Metzger BE, Cho NH, Roston SM, Rodvany R: Prepregnancy weight and antepartum insulin secretion predict glucose tolerance five years after gestational diabetes. *Diabetes Care* 16:1598–1605, 1993
  107. Greenberg LR, Moore TR, Murphy H: Gestational diabetes: antenatal variables as predictors of postpartum glucose intolerance. *Obstet Gynecol* 86:97–101, 1995
  108. Wein P, Beischer NA, Sheedy MT: Studies of postnatal diabetes mellitus in women who had gestational diabetes. Part 2. Prevalence and predictors of diabetes mellitus after delivery. *Aust N Z Obstet Gynecol* 37:420–423, 1997
  109. Kjos SL, Henry O, Lee RM, Buchanan TA, Mishell DR Jr: The effect of lactation on glucose and lipid metabolism in women with recent gestational diabetes. *Obstet Gynecol* 82:451–455, 1993
  110. McManus RM, Cunningham I, Watson A, Harker L, Finegood DT: Beta-cell function and visceral fat in lactating women with a history of gestational diabetes. *Metabolism* 50:715–719, 2001
  111. Diniz JMM, Da Costa THM: Independent of body adiposity, breast-feeding has a protective effect on glucose metabolism in young adult women. *Br J Nutr* 92:905–912, 2004
  112. Molsted-Pedersen L, Skouby SO, Damm P: Preconception counseling and contraception after gestational diabetes. *Diabetes* 40 (Suppl. 2):147–150, 1991
  113. Petersen KR, Skouby SO, Jespersen J: Contraception guidance in women with pre-existing disturbances in carbohydrate metabolism. *Eur J Contracept Reprod Health Care* 1:53–59, 1996
  114. Kjos SL, Peters RK, Xianh A, Thomas D, Schaefer U, Buchanan TA: Contraception and the risk of type 2 diabetes mellitus in Latina women with prior gestational diabetes mellitus. *JAMA* 280:533–538, 1998
  115. Holt RIG, Goddard JR, Clarke P, Coleman MAG: A postnatal fasting plasma glucose is useful in determining which women with gestational diabetes should undergo a postnatal oral glucose tolerance test. *Diabet Med* 20:594–598, 2003
  116. Cundy T, Ducker L, Wrathall K, Morrison J: Agreement between old and new diagnostic criteria in postpartum testing of women with gestational diabetes. *Diabetes Care* 21:1579–1580, 1998
  117. McElduff A, Hitchman R: Fasting plasma glucose values alone miss most abnormalities of glucose tolerance in the postpartum. *Diabet Med* 21:646–651, 2004
  118. Pomerleau J, McKeigue PM, Chaturvedi N: Relationship of fasting and post-load glucose levels to sex and alcohol consumption: are American Diabetes Association criteria biased against detection of diabetes in women? *Diabetes Care* 22:430–433, 1999
  119. Shaw JE, Zimmet PZ, Hodge AM, de Courten M, Dowse GK, Chitson P, Toumilehto J, Alberti KG: Impaired fasting glucose: how low should it go? *Diabetes Care* 23:34–39, 2000
  120. Gomyo M, Sakane N, Kamae I, Sato S,

- Suzuki K-I, Tominaga M, Kawazu S, Yoshinaga H, Tsushita K, Sato J, Sato Y, Tsujii S, Yoshida T, Seino Y, Usui T, Nanjo K, Hirata M, Kotani K, Hososako A, Kiyohara Y, Kuzuya H: Effects of sex, age and BMI on screening tests for impaired glucose tolerance. *Diabetes Res Clin Pract* 64:129–136, 2004
121. Hanai K, Kiuchi Y, Wasada T: Prevalence and progression of impaired fasting glucose homeostasis assessed by the different criteria for IFG in Japanese adults. *Diabetologia* 48:799–800, 2005
122. Padwal R, Majumdar SR, Johnson JA, Varney J, McAlister FA: A systematic review of drug therapy to delay or prevent type 2 diabetes. *Diabetes Care* 28:736–744, 2005
123. Krentz AJ, Bailey CJ: Oral antidiabetic agents: current role in type 2 diabetes mellitus. *Drugs* 65:385–341, 2005
124. Kirpichnikov DM, McFarlane SI, Sowers JR: Metformin: an update. *Ann Intern Med* 137:25–33, 2002
125. St John Sutton M, Rendell M, Dandona P, Dole JF, Murphy K, Patwardhan R, Patel J, Freed M: A comparison of the effects of rosiglitazone and glyburide on cardiovascular function and glycaemic control in patients with type 2 diabetes. *Diabetes Care* 25:2058–2064, 2002
126. Lautamaki R, Airaksinen J, Seppanen M, Toikka J, Luotolahti M, Ball E, Borra R, Harkonen R, Iozza P, Stewart M, Knuuti J, Nuutila P: Rosiglitazone improves myocardial glucose uptake in patients with type 2 diabetes and coronary artery disease: a 16-week randomized, double-blind, placebo-controlled study. *Diabetes* 54:2787–2794, 2005
127. van Wijk JPH, de Koning EJP, Cabezas MC, Rabelink TJ: Rosiglitazone improves postprandial triglyceride and free fatty acid metabolism in type 2 diabetes. *Diabetes Care* 28:844–849, 2005
128. Stumvoll M, Tataranni PA, Stefan N, Vozarova B, Bogardus C: Glucose allostasis. *Diabetes* 52:903–909, 2003
129. Hansson GK: Inflammation, atherosclerosis, and coronary artery disease. *N Engl J Med* 352:1685–1695, 2005
130. Wellen KE, Hotamisligil GS: Inflammation, stress, and diabetes. *J Clin Invest* 115:1111–1119, 2005
131. Bergholm R, Tiikkainen M, Vehkavaara S, Tamminen M, Teramo K, Rissanen A, Yki-Jarvinen H: Lowering of LDL cholesterol rather than moderate weight loss improves endothelium-dependent vasodilation in obese women with previous gestational diabetes. *Diabetes Care* 26:1667–1672, 2003
132. Thomas WG: Double trouble for angiotensin receptors in atherosclerosis. *N Engl J Med* 352:506–508, 2005
133. Johnson FK, Johnson RA, Durante W: Aldosterone promotes endothelial dysfunction via prostacyclin independent of hypertension. *Hypertension* 46:29–30, 2005
134. Pearson TA, Mensah GA, Alexander RW, Anderson JL, Cannon RO, Criqui M, Fadl YY, Fortmann SP, Hong Y, Myers GL, Rifai N, Smith SC, Taubert K, Tracy RP, Vinicor F: Markers of inflammation and cardiovascular disease: application to clinical and public health practice: a statement for health-care professionals from the Centers for Disease Control and Prevention and the American Heart Association. *Circulation* 107:499–511, 2003
135. Retnakaran R, Hanley AJG, Raif N, Connelly PW, Sermer M, Zinman B: C-reactive protein and gestational diabetes: the central role of maternal obesity. *J Clin Endocrinol Metab* 88:3507–3512, 2003
136. Kjos SL, Buchanan TA, Montoro M, Coulson A, Mestman JH: Serum lipids within 36 months of delivery in women with recent gestational diabetes. *Diabetes* 40 (Suppl. 2):142–146, 1991
137. Mestman JH: Follow-up studies in women with gestational diabetes mellitus: the experience at Los Angeles County/University of Southern California Medical Center. In *Gestational Diabetes*. Weiss PAM, Coustan DR, Eds. New York, Springer-Verlag, 1987, p. 191–198
138. Meyers-Seifer CH, Vohr BR: Lipid levels in former gestational diabetic mothers. *Diabetes Care* 19:1351–1356, 1996
139. Verma A, Boney CM, Tucker R, Vohr BR: Insulin resistance syndrome in women with prior history of gestational diabetes mellitus. *J Clin Endocrinol Metab* 87:3227–3235, 2002
140. Lauenborg J, Mathiesen E, Hansen T, Glumer C, Jorgensen T, Borch-Johnsen K, Hornnes P, Pedersen O, Damm P: The prevalence of the metabolic syndrome in a Danish population of women with previous gestational diabetes mellitus is three-fold higher than in the general population. *J Clin Endocrinol Metab* 90:4004–4010, 2005
141. Kautzky-Willer A, Krssak M, Winzer C, Pacini G, Tura A, Farhan S, Wagner O, Brabant G, Horn R, Stingl H, Schneider B, Waldhausl W, Roden M: Increased intramyocellular lipid concentration identifies impaired glucose metabolism in women with previous gestational diabetes. *Diabetes* 52:244–251, 2003
142. DiBenedetto A, Russo GT, Corrado F, DiCesare E, Alessi E, Nicocia G, D'Anna R, Cucinotta D: Inflammatory markers in women with a recent history of gestational diabetes mellitus. *J Endocrinol Invest* 28:34–38, 2005
143. Albareda M, Caballero A, Badell G, Rodriguez-Espinosa J, Ordonez-Llanos J, de Leiva A, Corcoy R: Metabolic syndrome at follow-up in women with and without gestational diabetes mellitus in index pregnancy. *Metabolism Clin Exper* 54:1115–1121, 2005
144. Kautzky-Willer A, Fasching P, Jilma B, Waldhausl W, Wagner OF: Persistent elevation and metabolic dependence of circulating E-selectin after delivery in women with gestational diabetes mellitus. *J Clin Endocrinol Metab* 82:4117–4121, 1997b
145. Sriharan M, Reichelt AJ, Opperman MLR, Duncan BB, Mengue SS, Crook MA, Schmidt MI: Total sialic acid and associated elements of the metabolic syndrome in women with and without previous gestational diabetes. *Diabetes Care* 25:1331–1335, 2002
146. Di Cianni G, Lencioni C, Volpe L, Ghio A, Cuccuru I, Pellegrini G, Benzi L, Miccoli R, Del Prato S: C-reactive protein and metabolic syndrome in women with previous gestational diabetes. *Diabetes Metab Res Rev* 23:135–140, 2007
147. Farhan S, Winzer C, Tura A, Quehenberger P, Bieglaier C, Wagner OF, Huber K, Waldhausl W, Pacini G, Kautzky-Willer A: Fibrinolytic dysfunction in insulin-resistant women with previous gestational diabetes. *Eur J Clin Invest* 36:345–352, 2006
148. Heitritter SM, Solomon CG, Mitchell GF, Skali-Ounis N, Seely EW: Subclinical inflammation and vascular dysfunction in women with previous gestational diabetes mellitus. *J Clin Endocrinol Metab* 90:3983–3988, 2005
149. Winzer C, Wagner O, Festa A, Schneider B, Roden M, Bancher-Todesca D, Pacini G, Funahashi T, Kautzky-Willer A: Plasma adiponectin, insulin sensitivity, and subclinical inflammation in women with prior gestational diabetes mellitus. *Diabetes Care* 27:1721–1727, 2004
150. Bo S, Monge L, Macchetta C, Menato G, Pinach S, Uberti B, Pagano G: Prior gestational hyperglycemia: a long-term predictor of the metabolic syndrome. *J Endocrinol Invest* 27:629–635, 2004
151. Carpenter MW: Gestational diabetes, pregnancy hypertension, and late vascular disease. *Diabetes Care* 30 (Suppl. 2):S246–S250, 2007
152. Clark HD, van Walraven C, Code C, Karovitch A, Keely E: Did publication of a clinical practice guideline recommendation to screen for type 2 diabetes in women with gestational diabetes change practice? *Diabetes Care* 26:265–268, 2003
153. Smirnakis KV, Chasan-Taber L, Wolf M, Markenson G, Ecker JL, Thadhani R: Postpartum diabetes screening in women with a history of gestational diabetes. *Obstet Gynecol* 106:1297–1303, 2005
154. Dornhorst A, Frost G: The potential for dietary intervention postpartum in

- women with gestational diabetes. *Diabetes Care* 20:1635–1637, 1997
155. Feig DS, Chen E, Naylor CD: Self-perceived health status of women three to five years after the diagnosis of gestational diabetes: a survey of cases and matched controls. *Am J Obstet Gynecol* 178:386–393, 1998
156. Wein P, Beischer N, Harris C, Permezel M: A trial of simple versus intensified dietary modification for prevention of progression to diabetes mellitus in women with impaired glucose tolerance. *Aust N Z J Obstet Gynecol* 39:161–165, 1999
157. Stage E, Ronneby H, Damm P: Lifestyle change after gestational diabetes. *Diabetes Res Clin Pract* 63:67–72, 2004
158. Smith BJ, Cheung NW, Bauman AE, Zehle K, McLean M: Postpartum physical activity and related psychosocial factors among women with recent gestational diabetes mellitus. *Diabetes Care* 28:2650–2654, 2005
